# Supplementary material for: Dissection of closely linked QTLs controlling stigma exsertion rate in rice by substitution mapping
Source: PubMed Central journal article supplement (PMC7973394; doi:10.1007/s00122-021-03771-9), 2021-01-25
Supplement: 122_2021_3771_MOESM1_ESM.pdf [file 122_2021_3771_MOESM1_ESM.pdf]

**Table S1** Stigma exertion rate of the 7 SSSLs in 9 cropping seasons from 2014 to 2018

| SSSL       | Chr. | Donor | SER (%)    |            |            |            |            |            |            |            |            |            | <i>P</i> value of SER |          |          |          |          |          |          |          |          |          |
|------------|------|-------|------------|------------|------------|------------|------------|------------|------------|------------|------------|------------|-----------------------|----------|----------|----------|----------|----------|----------|----------|----------|----------|
|            |      |       | 2014 FCS   | 2014 SCS   | 2015 FCS   | 2015 SCS   | 2016 FCS   | 2016 SCS   | 2017 FCS   | 2017 SCS   | 2018 FCS   | Average    | 2014 FCS              | 2014 SCS | 2015 FCS | 2015 SCS | 2016 FCS | 2016 SCS | 2017 FCS | 2017 SCS | 2018 FCS | Average  |
| A88        | 3    | IB    | 49.69±2.25 | 43.00±1.82 | 52.47±2.10 | 61.17±1.93 | 50.35±1.67 | 62.82±1.09 | 56.64±1.53 | 63.62±3.75 | 57.89±1.63 | 55.37±1.35 | 1.34E-09              | 1.34E-09 | 1.34E-09 | 1.44E-08 | 1.34E-09 | 1.00E-05 | 3.10E-08 | 8.05E-08 | 1.94E-08 | 2.23E-08 |
| A7         | 2    | IB    | 40.88±1.96 | 34.84±1.22 | 49.93±1.82 | 44.02±0.80 | 40.16±1.14 | 47.48±0.89 | 47.82±1.79 | 55.39±0.97 | 50.05±0.82 | 45.63±1.19 | 2.39E-09              | 5.35E-08 | 1.34E-09 | 2.79E-05 | 1.59E-09 | 1.00E-04 | 8.02E-08 | 2.16E-06 | 1.94E-08 | 2.23E-08 |
| A13        | 2    | IB    | 37.31±2.01 | 46.17±2.25 | 45.11±2.35 | 60.44±1.03 | 45.62±1.60 | 52.66±0.74 | 56.57±0.85 | 63.62±2.01 | 48.87±1.97 | 50.73±1.58 | 4.82E-07              | 1.34E-09 | 1.73E-09 | 1.44E-08 | 1.34E-09 | 1.00E-05 | 3.10E-08 | 8.16E-08 | 1.94E-08 | 2.23E-08 |
| A35        | 2    | IB    | 39.20±1.25 | 34.91±1.77 | 43.89±2.17 | 55.39±2.19 | 41.67±1.30 | 40.64±1.13 | 44.78±1.54 | 56.59±3.05 | 46.05±1.76 | 44.82±1.39 | 1.93E-08              | 4.97E-08 | 3.89E-09 | 1.44E-08 | 1.35E-09 | 1.59E-04 | 4.52E-07 | 1.21E-06 | 1.94E-08 | 2.23E-08 |
| A37        | 2    | IB    | 39.44±2.01 | 38.31±1.44 | 45.29±1.60 | 53.34±2.04 | 40.76±1.55 | 41.10±0.82 | 42.29±1.67 | 56.13±1.78 | 46.10±0.86 | 44.74±1.21 | 1.42E-08              | 1.44E-09 | 1.62E-09 | 1.44E-08 | 1.40E-09 | 5.00E-04 | 3.05E-06 | 1.51E-06 | 1.94E-08 | 2.23E-08 |
| A41        | 2    | IB    | 34.11±0.97 | 35.98±1.78 | 39.21±1.69 | 51.65±1.74 | 39.92±0.99 | 51.02±1.24 | 41.59±0.84 | 62.97±0.69 | 47.89±1.21 | 45.08±1.72 | 7.88E-05              | 8.55E-09 | 3.06E-06 | 1.45E-08 | 1.77E-09 | 1.00E-05 | 5.44E-06 | 9.81E-08 | 1.94E-08 | 2.23E-08 |
| A42        | 2    | IB    | 38.84±1.79 | 40.40±1.56 | 44.23±2.06 | 59.84±1.30 | 45.87±1.07 | 62.20±1.42 | 50.61±1.04 | 65.82±2.15 | 52.66±2.14 | 50.93±1.88 | 3.73E-08              | 1.34E-09 | 2.83E-09 | 1.44E-08 | 1.34E-09 | 1.00E-05 | 3.91E-08 | 5.12E-08 | 1.94E-08 | 2.23E-08 |
| HJX74 (CK) | -    | -     | 23.40±1.16 | 20.49±1.43 | 24.84±1.50 | 33.48±0.23 | 26.66±0.64 | 35.37±0.90 | 27.34±1.22 | 29.28±1.52 | 29.31±0.40 | 27.83±0.91 |                       |          |          |          |          |          |          |          |          |          |

*SER* stigma exertion rate, *IB* IR66897B, *HJX74* as control, *FCS* the first cropping season, *SCS* the second cropping season. Values were mean ± S.E. The *P* value were from Dunnett *t*-test between each SSSL and HJX74.

**Table S2** Markers developed for detection of the substituted segments of SSSLs

| Primer name | Forward primer         | Reverse primer         |
|-------------|------------------------|------------------------|
| ID79        | ACGTACACACAGCACACAAT   | CAAAAAGGTTAATTTGCTTG   |
| PSM16       | GGTCTTAATGCCCTCTTCCC   | ACAACCAAACAAGCCATCCT   |
| ID71        | GATGAACTCCACCACGAA     | GAGAAGGGGAGGAGAGTG     |
| ID61        | GTTCTGGTTGGTAGGTTTCA   | TTGGGAGCTTTTCTTCTGTA   |
| ID03M59-4   | TAAAACAGCATAACCATGCAA  | ATTAAACTTGCAGTTGGCTC   |
| ID03M08     | TAGCGGTTAAGGAAAGACAG   | CCAAGAGAGCTAGACTTCCA   |
| ID03M59-12  | GTGGACCGAGAGGCTGAC     | GGTATGGCCATTTGAAGTT    |
| ID03M59-20  | GTGGATGTCCGGTCTCCAAGT  | AGGTTTGAGGCAGGGGTAAT   |
| ID03M81     | TGAAAGGAATAAAAAATCTAA  | TTCTAACGGGAGGATTTATG   |
| ID03M59-6   | GACGATAAAATCTTGTCCCA   | TCTGTTTACGTTCTCGGTTT   |
| PSM19       | CGAGTAAGGGTTCACCAATCA  | GCATCGGTCTCCTCCGCAGC   |
| ID03M04-9   | TAGATCAGGCTGAGTCCATT   | TGGCAAGTACAATCACAAAA   |
| ID03M04-30  | ACCTGAACAAACGGAGTAGA   | GAGACGTCACAATCCTCTTC   |
| ID03M04-33  | CCTGGGACGATCAATTTT     | TTCGAATTTGAATAGGGTAT   |
| ID03M04-7   | TGTTATAACCTACAGGCCAG   | GGTACGTCTTGCTCAGGAAC   |
| ID03M04-16  | AAATAGCAGTGC GTTGAAT   | CAGCTGATAATATGGATGGC   |
| ID03M04-17  | GTGTATTCCCATCATCGTGT   | ATTAAGTTCCTCTGTGCTCC   |
| PSM21       | CAGCATTATTCTGGTTGGCATT | ATACATCGGCGGAGGAGCA    |
| ID03M141-9  | ACAGCTACAGGGTATGTCGT   | TCTCAATTTGTAAGGTTGCA   |
| PSM377      | CTCACAAGAACGCCACAAAA   | TGACCAGAAAGGAGAAGGAAA  |
| PSM378      | TGCTTATTGGTTTGTCTTGGC  | AAGAATAGCCTTTGCCTCCA   |
| ID03M141-16 | AGTTGTATCTGCCTCCAAAA   | CTTCTACCTCAGGAGCTTCA   |
| ID03M141-19 | AGGACAAGTGTTC CAAGAA   | ATTGCCACAGTTCAACCTAC   |
| PSM379      | GCATCTCCTTTTGTCTGTTCC  | TGCCTCGTCTCCATCAAGTTTT |
| ID03Ma21    | CAACCATATTGGCCTATCTA   | GAGCTTGGTGTCTATAACCG   |
| ID03Ma27    | AGACACACATAGTGGGCATT   | AGAAAAGGTCTGGATAGATG   |
| ID03Ma31    | ATATGCAGATCAATCAACGG   | ACCAGCAAATGACTAAATTG   |
| ID02M23     | ATGCGCTTTATGGGTACTTA   | TTTGCTTCTGGTAAACACCT   |
| PSM116      | GTCCCTCTCCTCCATTCTC    | CCCCCTCTCCTCACAATTC    |
| ID02MQ51    | CGTACTTTTCTCTCTCCTG    | ACTGACTCGGGAGAATACTG   |
| PSM117      | GGTTGTGCCATGGCTAGTTT   | CGCGAGCGTTTTAGCATAAT   |
| ID02MQ21    | GATCATCTCATGCCTCCTAC   | CATCTCCAATATGACCAAC    |
| PSM119      | CAGAGAGAGAGCCAGAGGA    | TCTGTGCTAGCAGCCTCTCA   |
| ID02M01     | CATAGCCTAGTCGAAATGA    | CGTTAACGATGGAGGTTAAG   |
| ID02M04     | ATCACGTCACCTTGCATATC   | CTACTACTCTTGGCCGTGAC   |

**Table S3** Substituted segments of the SSSLs

| SSSL | Chr. | Donor | QTL                             | Substituted segment                                                                                                                                                                                                                                                    | Position of chromosomes (kb) |          |          |          | Length of segments (kb) |                  |                  |
|------|------|-------|---------------------------------|------------------------------------------------------------------------------------------------------------------------------------------------------------------------------------------------------------------------------------------------------------------------|------------------------------|----------|----------|----------|-------------------------|------------------|------------------|
|      |      |       |                                 |                                                                                                                                                                                                                                                                        | P1                           | P2       | P3       | P4       | L <sub>min</sub>        | L <sub>max</sub> | L <sub>est</sub> |
| A88  | 3    | IB    | <i>qSER-3a</i> , <i>qSER-3b</i> | ID79--PSM16-ID71-ID61-ID03M59-4-ID03M08-ID03M59-12-ID03M59-20-ID03M81-ID03M59-6-PSM19-ID03M04-9-ID03M04-30-ID03M04-33-ID03M04-7-ID03M04-16-ID03M04-17-PSM21-ID03M141-9-RM6931-PSM377-PSM378-RM15152-ID03M141-16-ID03M141-19-PSM379-ID03Ma21-ID03Ma27-RM15196--ID03Ma31 | 12930.12                     | 13026.79 | 16838.82 | 16867.46 | 3812.03                 | 3937.34          | 3874.68          |
| A7   | 2    | IB    | <i>qSER-2a</i> , <i>qSER-2b</i> | RM7652--RM12521-RM1285-ID02M23-RM7581-RM5622-RM555-RM3732-PSM116-ID02MQ51-PSM117-RM12655-ID02MQ21-PSM119-RM5897--RM492                                                                                                                                                 | 3478.72                      | 3653.93  | 6733.54  | 7285.64  | 3079.61                 | 3806.92          | 3443.26          |
| A13  | 2    | IB    | <i>qSER-2a</i> , <i>qSER-2b</i> | RM7652--RM12521-RM1285-ID02M23-RM7581-RM5622-RM555-RM3732-PSM116-ID02MQ51-PSM117-RM12655-ID02MQ21-PSM119-RM5897-RM492-RM322-RM145-ID02M01--ID02M04                                                                                                                     | 3478.72                      | 3653.93  | 7850.76  | 8359.48  | 4196.84                 | 4880.76          | 4538.80          |
| A35  | 2    | IB    | <i>qSER-2a</i> , <i>qSER-2b</i> | RM7652--RM12521-RM1285-ID02M23-RM7581-RM5622-RM555-RM3732-PSM116-ID02MQ51-PSM117-RM12655--ID02MQ21                                                                                                                                                                     | 3478.72                      | 3653.93  | 5341.99  | 5477.52  | 1688.06                 | 1998.80          | 1843.43          |
| A37  | 2    | IB    | <i>qSER-2a</i> , <i>qSER-2b</i> | ID02M23--RM7581-RM5622-RM555-RM3732-PSM116-ID02MQ51-PSM117-RM12655-ID02MQ21-PSM119-RM5897-RM492-RM322-RM145-ID02M01-ID02M04-RM12855-RM12865--RM71                                                                                                                      | 4037.21                      | 4206.48  | 8697.37  | 8760.43  | 4490.89                 | 4723.23          | 4607.06          |
| A41  | 2    | IB    | <i>qSER-2b</i>                  | ID02MQ51--PSM117-RM12655-ID02MQ21-PSM119-RM5897-RM492-RM322-RM145-ID02M01-ID02M04-RM12855-RM12865--RM71                                                                                                                                                                | 5186.03                      | 5204.96  | 8697.37  | 8760.43  | 3492.41                 | 3574.41          | 3533.41          |
| A42  | 2    | IB    | <i>qSER-2a</i> , <i>qSER-2b</i> | RM7652--RM12521-RM1285-ID02M23-RM7581-RM5622-RM555-RM3732-PSM116-ID02MQ51-PSM117-RM12655-ID02MQ21-PSM119-RM5897-RM492-RM322-RM145-ID02M01-ID02M04-RM12855-RM12865--RM71                                                                                                | 3478.72                      | 3653.93  | 8697.37  | 8760.43  | 5043.44                 | 5281.71          | 5162.58          |

*IB* IR66897B, P2 and P3 are the marker positions of donor genotype at the front-end and after-end of the substitution segment, respectively. P1 and P4 are the marker positions of background genotype flanking out of the front-end and after-end of the substitution segment, respectively. L<sub>min</sub> = minimum length of substituted segment (kb) = P3 - P2, L<sub>max</sub> = maximum length of substituted segment (kb) = P4 - P1, L<sub>est</sub> = estimated length of substituted segment (kb) = (L<sub>min</sub> + L<sub>max</sub>) / 2. '--' represents the region of chromosome recombination. '-' represents connection of substituted segment.

**Table S4** Phenotypes of agronomic traits in the 7 SSSLs and HJX74

| SSSL  | Heading date (d) |              | Plant height (cm) |             | Grain number per panicle |              | Panicle length (cm) |             | Seed setting rate (%) |             | Grain length (mm) |           | Grain width (mm) |            | Thousand grain weight (g) |              |
|-------|------------------|--------------|-------------------|-------------|--------------------------|--------------|---------------------|-------------|-----------------------|-------------|-------------------|-----------|------------------|------------|---------------------------|--------------|
|       | 2018 FCS         | 2018 SCS     | 2018 FCS          | 2018 SCS    | 2018 FCS                 | 2018 SCS     | 2018 FCS            | 2018 SCS    | 2018 FCS              | 2018 SCS    | 2018 FCS          | 2018 SCS  | 2018 FCS         | 2018 SCS   | 2018 FCS                  | 2018 SCS     |
| A88   | 97.80±0.42       | 73.78±0.40   | 107.30±0.96       | 95.10±0.85  | 222.19±11.50             | 183.15±7.22* | 23.76±0.24          | 21.46±0.24* | 74.20±1.93            | 84.00±0.77  | 8.24±0.03         | 8.44±0.03 | 2.63±0.01        | 2.61±0.02  | 21.19±0.21                | 23.01±0.40   |
| A7    | 96.50±0.50*      | 73.00±0.47   | 110.10±0.64       | 93.30±0.76* | 211.92±7.23*             | 203.28±3.55  | 22.58±0.24**        | 23.07±0.33  | 78.00±1.70            | 85.20±0.97  | 8.17±0.02         | 8.34±0.02 | 2.65±0.02        | 2.57±0.01  | 21.17±0.36                | 21.45±0.07** |
| A13   | 96.30±0.37**     | 73.10±0.46   | 110.00±1.74       | 95.30±0.47  | 253.22±8.92              | 181.02±12.16 | 25.14±0.34          | 24.32±0.34  | 77.80±2.75            | 83.60±0.98  | 8.31±0.03         | 8.50±0.04 | 2.56±0.02**      | 2.54±0.01* | 20.55±0.25                | 22.09±0.34*  |
| A35   | 97.30±0.47       | 73.10±0.48   | 112.40±0.91**     | 98.30±0.88  | 224.63±16.18             | 219.51±7.76  | 22.71±0.38**        | 23.13±0.28  | 77.40±2.29            | 87.00±1.14* | 8.24±0.03         | 8.43±0.04 | 2.57±0.01**      | 2.57±0.02  | 20.16±0.40*               | 21.74±0.24** |
| A37   | 96.70±0.52*      | 72.30±0.54** | 112.20±0.73**     | 97.80±1.12  | 231.27±13.32             | 220.17±12.50 | 23.46±0.42*         | 22.79±0.33  | 77.80±2.08            | 86.80±0.49  | 8.22±0.02         | 8.36±0.04 | 2.67±0.02        | 2.61±0.01  | 20.89±0.34                | 22.71±0.16   |
| A41   | 97.70±0.47       | 76.00±0.33   | 109.20±0.99       | 97.50±1.15  | 213.76±7.81*             | 206.57±7.18  | 22.56±0.30**        | 22.71±0.71  | 76.40±1.69            | 84.40±0.68  | 8.37±0.02         | 8.41±0.04 | 2.60±0.01        | 2.58±0.02  | 21.34±0.16                | 22.62±0.20   |
| A42   | 97.10±0.43       | 73.10±0.64   | 109.60±0.79       | 96.70±1.26  | 212.63±18.90*            | 180.42±6.12* | 23.35±0.69*         | 22.24±0.29  | 77.40±2.50            | 81.00±2.81  | 8.33±0.02         | 8.42±0.02 | 2.58±0.01**      | 2.57±0.01  | 20.47±0.28                | 21.76±0.22** |
| HJX74 | 98.60±0.60       | 74.98±0.45   | 107.00±1.02       | 96.23±0.42  | 258.44±8.58              | 209.97±5.89  | 24.81±0.22          | 23.16±0.33  | 74.70±1.62            | 82.40±0.87  | 8.26±0.03         | 8.45±0.03 | 2.64±0.01        | 2.60±0.01  | 21.15±0.19                | 23.06±0.14   |

HJX74 as control, FCS the first cropping season, SCS the second cropping season. Data were presented as mean ± S.E., \*  $P$ -value  $\leq 0.05$ , \*\*  $P$ -value  $\leq 0.01$ , Dunnett  $t$ -test.

**Table S5** The stigma exertion rate of the SSSLs and secondary SSSLs used to map *qSER-2a* or/and *qSER-2b*

| Secondary SSSL  | QTL                             | SER (%)                 |                          |                         |
|-----------------|---------------------------------|-------------------------|--------------------------|-------------------------|
|                 |                                 | 2018 SCS                | 2019 FCS                 | Average                 |
| A42-34          | <i>qSER-2a</i>                  | 45.83±1.45 <sup>B</sup> | 47.66±2.59 <sup>AB</sup> | 46.75±1.24 <sup>B</sup> |
| A42-69          | <i>qSER-2a</i>                  | 44.53±1.94 <sup>B</sup> | 47.06±1.75 <sup>AB</sup> | 45.79±1.51 <sup>B</sup> |
| A42-17          | <i>qSER-2b</i>                  | 46.41±1.38 <sup>B</sup> | 48.22±1.20 <sup>AB</sup> | 47.32±0.69 <sup>B</sup> |
| A41             | <i>qSER-2b</i>                  | 44.14±1.30 <sup>B</sup> | 45.27±1.85 <sup>B</sup>  | 44.71±1.82 <sup>B</sup> |
| A42-24          | <i>qSER-2a</i> , <i>qSER-2b</i> | 51.12±2.57 <sup>A</sup> | 51.58±2.16 <sup>AB</sup> | 51.35±1.01 <sup>A</sup> |
| A35             | <i>qSER-2a</i> , <i>qSER-2b</i> | 50.78±1.26 <sup>A</sup> | 51.85±1.12 <sup>AB</sup> | 51.32±3.04 <sup>A</sup> |
| A37             | <i>qSER-2a</i> , <i>qSER-2b</i> | 50.42±1.43 <sup>A</sup> | 52.05±2.07 <sup>A</sup>  | 51.23±2.90 <sup>A</sup> |
| A42             | <i>qSER-2a</i> , <i>qSER-2b</i> | 51.31±2.68 <sup>A</sup> | 51.64±1.58 <sup>AB</sup> | 51.47±0.59 <sup>A</sup> |
| A42-45          | -                               | 27.62±0.73 <sup>C</sup> | 27.92±1.32 <sup>C</sup>  | 27.77±0.68 <sup>C</sup> |
| A42-12          | -                               | 28.91±0.99 <sup>C</sup> | 27.74±1.15 <sup>C</sup>  | 28.32±0.73 <sup>C</sup> |
| HJX74 (Control) | -                               | 27.66±0.41 <sup>C</sup> | 28.96±0.53 <sup>C</sup>  | 28.31±0.57 <sup>C</sup> |

*FCS* the first cropping season, *SCS* the second cropping season. Data were presented as mean ± S.E.,  $\alpha$  =0.01, Duncan. Average were calculated from values of all samples in two cropping seasons.

**Table S6** The stigma exertion rate of the SSSL and secondary SSSLs used to map *qSER-3a* or/and *qSER-3b*

| Secondary SSSL        | QTL                             | SER (%)                 |                         |                         |
|-----------------------|---------------------------------|-------------------------|-------------------------|-------------------------|
|                       |                                 | 2018 FCS                | 2018 SCS                | Average                 |
| <b><i>qSER-3a</i></b> |                                 |                         |                         |                         |
| A88-59-15-3           | <i>qSER-3a</i>                  | 41.52±1.93 <sup>B</sup> | 42.67±2.02 <sup>B</sup> | 42.10±2.63 <sup>B</sup> |
| A88-59-15-19          | <i>qSER-3a</i>                  | 42.55±1.35 <sup>B</sup> | 45.61±1.87 <sup>B</sup> | 44.08±2.03 <sup>B</sup> |
| A88-59-15-10          | <i>qSER-3a</i>                  | 43.98±2.08 <sup>B</sup> | 45.52±1.84 <sup>B</sup> | 44.75±2.13 <sup>B</sup> |
| A88-59-15             | <i>qSER-3a</i>                  | 42.40±0.83 <sup>B</sup> | 43.85±1.44 <sup>B</sup> | 43.13±1.69 <sup>B</sup> |
| A88                   | <i>qSER-3a</i> , <i>qSER-3b</i> | 57.89±1.62 <sup>A</sup> | 54.61±0.72 <sup>A</sup> | 56.40±1.04 <sup>A</sup> |
| A88-59-15-16          | -                               | 26.27±0.90 <sup>C</sup> | 28.91±1.52 <sup>C</sup> | 27.59±1.07 <sup>C</sup> |
| A88-59-15-20          | -                               | 27.41±0.88 <sup>C</sup> | 27.40±1.18 <sup>C</sup> | 27.41±1.03 <sup>C</sup> |
| HJX74 (Control)       | -                               | 25.97±1.64 <sup>C</sup> | 26.23±0.59 <sup>C</sup> | 26.10±1.50 <sup>C</sup> |
| <b><i>qSER-3b</i></b> |                                 |                         |                         |                         |
| A88-141-2             | <i>qSER-3b</i>                  | 42.25±2.00 <sup>B</sup> | 42.84±1.72 <sup>B</sup> | 42.54±2.33 <sup>B</sup> |
| A88-141-2-11          | <i>qSER-3b</i>                  | 44.95±0.94 <sup>B</sup> | 46.41±1.57 <sup>B</sup> | 45.68±1.02 <sup>B</sup> |
| A88-141-2-21          | <i>qSER-3b</i>                  | 42.13±0.92 <sup>B</sup> | 43.49±1.11 <sup>B</sup> | 42.81±1.25 <sup>B</sup> |
| A88                   | <i>qSER-3a</i> , <i>qSER-3b</i> | 57.89±1.62 <sup>A</sup> | 54.61±0.72 <sup>A</sup> | 56.40±1.04 <sup>A</sup> |
| A88-141-2-24          | -                               | 26.23±0.73 <sup>C</sup> | 26.70±1.87 <sup>C</sup> | 26.46±1.13 <sup>C</sup> |
| A88-141-2-12          | -                               | 26.50±0.79 <sup>C</sup> | 27.77±0.93 <sup>C</sup> | 27.13±0.99 <sup>C</sup> |
| HJX74 (Control)       | -                               | 28.40±0.89 <sup>C</sup> | 27.18±1.30 <sup>C</sup> | 27.79±1.57 <sup>C</sup> |

FCS the first cropping season, SCS the second cropping season. Data were presented as mean ± S.E.,  $\alpha=0.01$ , Duncan. Average were calculated from values of all samples in two cropping seasons.

**Table S7** Comparison of SER, additive effects and epistatic effects in the pyramiding line P223 with those in single-QTL groups and two-QTL groups of SSSLs

| Group | Genotype                                         | SER (%)                 | Additive effect (%) | Epistatic effect (%) |
|-------|--------------------------------------------------|-------------------------|---------------------|----------------------|
| S2a   | <i>qSER-2a</i>                                   | 46.27±0.71 <sup>D</sup> | 9.62±0.36***        | -                    |
| S2b   | <i>qSER-2b</i>                                   | 46.01±1.32 <sup>D</sup> | 9.49±0.66***        | -                    |
| S3a   | <i>qSER-3a</i>                                   | 43.51±0.59 <sup>D</sup> | 8.24±0.30***        | -                    |
| S3b   | <i>qSER-3b</i>                                   | 43.68±1.01 <sup>D</sup> | 8.32±0.50***        | -                    |
| S22   | <i>qSER-2a</i> , <i>qSER-2b</i>                  | 51.34±0.42 <sup>C</sup> | 12.15±0.21***       | -13.90±0.42***       |
| S33   | <i>qSER-3a</i> , <i>qSER-3b</i>                  | 56.25±1.04 <sup>B</sup> | 14.61±0.52***       | -3.90±1.04**         |
| P223  | <i>qSER-2a</i> , <i>qSER-2b</i> , <i>qSER-3a</i> | 67.18±1.37 <sup>A</sup> | 20.07±0.69***       | -14.58±1.38***       |
| HJX74 | Control                                          | 27.04±0.62 <sup>E</sup> | -                   | -                    |

*SER*, stigma exertion rate. Data were presented as mean ± S.E.. The SER data is averages of those from 2018 FCS to 2019 FCS. Differences of SER was tested by the Duncan,  $\alpha = 0.01$ . Significances of additive effect and epistatic effect were tested by the Student's *t* test respectively. "\*\*\*" and "\*\*\*\*" indicated the significance at 0.01 and 0.001 level, respectively. *FCS* the first cropping season, *SCS* the second cropping season.

**Table S8** The gene annotation within the maximum interval of *qSER-2a* identified from the databases of RAP and MSU

| RAP-ID       | MSU-ID         | Gene annotation                                                                                                 |
|--------------|----------------|-----------------------------------------------------------------------------------------------------------------|
| Os02g0173700 | LOC_Os02g07740 | RNA binding protein, putative, expressed                                                                        |
| Os02g0173800 | LOC_Os02g07750 | Cell cycle control protein, putative, expressed                                                                 |
| Os02g0173900 | LOC_Os02g07760 | Aldehyde dehydrogenase, putative, expressed                                                                     |
| Os02g0174000 | LOC_Os02g07770 | Myb transcription factor, putative, expressed                                                                   |
| Os02g0174100 | LOC_Os02g07780 | OsSPL4-SBP-box gene family member, expressed                                                                    |
| Os02g0174200 | LOC_Os02g07790 | Serine/threonine-protein kinase HT1, putative, expressed                                                        |
| Os02g0174300 | LOC_Os02g07800 | Transcription factor, putative, expressed                                                                       |
| Os02g0174400 | LOC_Os02g07810 | Inactive receptor kinase At2g26730 precursor, putative, expressed                                               |
| Os02g0174800 | LOC_Os02g07820 | DUF581 domain containing protein, expressed                                                                     |
| Os02g0175000 | LOC_Os02g07830 | OsHKT1;3 - Na <sup>+</sup> transporter, expressed                                                               |
| Os02g0175100 | LOC_Os02g07840 | BZIP transcription factor domain containing protein, expressed                                                  |
| Os02g0175302 | LOC_Os02g07860 | Conserved hypothetical protein                                                                                  |
| Os02g0175400 | LOC_Os02g07870 | ATP synthase, putative, expressed                                                                               |
| Os02g0175500 | LOC_Os02g07880 | DNA binding protein, putative, expressed                                                                        |
| Os02g0175600 | LOC_Os02g07890 | 60S ribosomal protein L27a-3, putative, expressed                                                               |
| Os02g0175700 | LOC_Os02g07900 | ANTH/ENTH domain containing protein, putative, expressed                                                        |
| Os02g0175800 | LOC_Os02g07910 | Fiber protein Fb15, putative, expressed                                                                         |
| Os02g0175900 | LOC_Os02g07920 | Expressed protein                                                                                               |
| Os02g0176000 | LOC_Os02g07930 | B-box zinc finger family protein, putative, expressed                                                           |
| Os02g0176100 | LOC_Os02g07960 | STRUBBELIG-RECEPTOR FAMILY 3 precursor, putative, expressed                                                     |
| Os02g0176200 | LOC_Os02g07970 | Expressed protein                                                                                               |
| Os02g0176400 | LOC_Os02g07980 | Expressed protein                                                                                               |
| Os02g0176600 | LOC_Os02g08000 | Expressed protein                                                                                               |
| Os02g0176650 | LOC_Os02g08010 | LTPL43-Protease inhibitor/seed storage/LTP family protein precursor, putative, expressed                        |
| Os02g0176700 | LOC_Os02g08014 | Calcium-transporting ATPase 9, plasma membrane-type, putative, expressed                                        |
| Os02g0176900 | LOC_Os02g08030 | Aldose 1-epimerase, putative, expressed                                                                         |
| Os02g0177300 | LOC_Os02g08070 | OsSPL5-SBP-box gene family member, expressed                                                                    |
| Os02g0177400 | LOC_Os02g08080 | Expressed protein                                                                                               |
| Os02g0177500 | LOC_Os02g08090 | LSM domain containing protein, expressed                                                                        |
| Os02g0177600 | LOC_Os02g08100 | AMP-binding domain containing protein, expressed                                                                |
| Os02g0177700 | LOC_Os02g08110 | Membrane associated DUF588 domain containing protein, putative, expressed                                       |
| Os02g0177800 | LOC_Os02g08120 | Calmodulin binding protein, putative, expressed                                                                 |
| Os02g0177900 | LOC_Os02g08130 | FGGY family of carbohydrate kinases, putative, expressed                                                        |
| Os02g0178000 | LOC_Os02g08140 | CAMK_KIN1/SNF1/Nim1_like.14-CAMK includes calcium/calmodulin depeudent protein kinases, expressed               |
| Os02g0178100 | LOC_Os02g08150 | CCT/B-box zinc finger protein, putative, expressed                                                              |
| Os02g0178200 | LOC_Os02g08160 | OsFBD6-F-box and FBD domain containing protein, expressed                                                       |
| Os02g0178300 | LOC_Os02g08170 | GDU1, putative, expressed                                                                                       |
| Os02g0178400 | LOC_Os02g08180 | Protein transport protein SEC61 subunit gamma, putative, expressed                                              |
| Os02g0178500 | LOC_Os02g08190 | CYPRO4, putative, expressed                                                                                     |
| Os02g0178600 | LOC_Os02g08200 | Zinc finger, C3HC4 type domain containing protein, expressed                                                    |
| Os02g0178700 | LOC_Os02g08220 | Expressed protein                                                                                               |
| Os02g0178800 | LOC_Os02g08230 | WAX2, putative, expressed                                                                                       |
| Os02g0179000 | LOC_Os02g08250 | Expressed protein                                                                                               |
| Os02g0179100 | LOC_Os02g08260 | HD domain containing protein 2, putative, expressed                                                             |
| Os02g0179200 | LOC_Os02g08270 | Class I glutamine amidotransferase, putative, expressed                                                         |
| Os02g0174250 |                | Hypothetical protein                                                                                            |
| Os02g0174450 |                | Hypothetical gene                                                                                               |
| Os02g0174500 |                | Hypothetical gene                                                                                               |
| Os02g0174700 |                | Hypothetical protein                                                                                            |
| Os02g0174900 |                | Hypothetical gene                                                                                               |
| Os02g0175200 |                | DUF630/DUF632 domains containing protein, putative, expressed                                                   |
| Os02g0175250 |                | Hypothetical protein                                                                                            |
| Os02g0175301 |                | DUF630/DUF632 domains containing protein, putative, expressed                                                   |
| Os02g0175750 |                | Hypothetical protein                                                                                            |
| Os02g0175850 |                | Non-protein coding transcript                                                                                   |
| Os02g0175950 |                | Non-protein coding transcript                                                                                   |
| Os02g0176300 |                | Hypothetical protein                                                                                            |
| Os02g0176500 |                | Hypothetical gene                                                                                               |
| Os02g0177633 |                | Hypothetical protein                                                                                            |
| Os02g0177666 |                | Hypothetical protein                                                                                            |
| Os02g0178250 |                | Hypothetical protein                                                                                            |
| Os02g0178901 |                | Non-protein coding transcript                                                                                   |
| Os02g0179225 |                | Hypothetical protein                                                                                            |
| Os02g0179250 |                | Hypothetical protein                                                                                            |
|              | LOC_Os02g07850 | DUF630/DUF632 domains containing protein, putative, expressed                                                   |
|              | LOC_Os02g07940 | Retrotransposon protein, putative, unclassified, expressed                                                      |
|              | LOC_Os02g07950 | Retrotransposon protein, putative, unclassified                                                                 |
|              | LOC_Os02g07990 | Hypothetical protein                                                                                            |
|              | LOC_Os02g08018 | Calcium-transporting ATPase 9, plasma membrane-type, putative, expressed                                        |
|              | LOC_Os02g08020 | Hypothetical protein                                                                                            |
|              | LOC_Os02g08040 | Expressed protein                                                                                               |
|              | LOC_Os02g08050 | Expressed protein                                                                                               |
|              | LOC_Os02g08060 | Expressed protein                                                                                               |
|              | LOC_Os02g08210 | Expressed protein                                                                                               |
|              | LOC_Os02g08240 | STE_PAK_Ste20_STLK.1-STE kinases include homologs to sterile 7, sterile 11 and sterile 20 from yeast, expressed |



**Table S9** The gene annotation within the maximum interval of *qSER-2b* identified from the databases of RAP and MSU

| RAP-ID       | MSU-ID         | Gene annotation                                                                          |
|--------------|----------------|------------------------------------------------------------------------------------------|
| Os02g0193200 | LOC_Os02g09980 | Expressed protein                                                                        |
| Os02g0193300 | LOC_Os02g09990 | Expressed protein                                                                        |
| Os02g0193400 | LOC_Os02g10000 | Zinc-binding protein, putative, expressed                                                |
| Os02g0193500 | LOC_Os02g10010 | Expressed protein                                                                        |
| Os02g0193600 | LOC_Os02g10020 | Mad3/BUB1 homology region 1 domain containing protein, expressed                         |
| Os02g0193732 | LOC_Os02g10030 | Expressed protein                                                                        |
| Os02g0193800 | LOC_Os02g10040 | Guanine nucleotide-exchange protein like, putative, expressed                            |
| Os02g0193900 | LOC_Os02g10050 | Expressed protein                                                                        |
| Os02g0194000 | LOC_Os02g10060 | SWIRM domain containing protein, expressed                                               |
| Os02g0194100 | LOC_Os02g10070 | Citrate synthase, putative, expressed                                                    |
| Os02g0194200 | LOC_Os02g10080 | Zinc finger C-x8-C-x5-C-x3-H type family protein, expressed                              |
| Os02g0194300 | LOC_Os02g10090 | Expressed protein                                                                        |
| Os02g0194400 | LOC_Os02g10100 | Leucine-rich repeat receptor protein kinase EXS precursor, putative, expressed           |
| Os02g0194600 | LOC_Os02g10110 | Leucine Rich Repeat family protein, expressed                                            |
| Os02g0194700 | LOC_Os02g10120 | Lipoxygenase, putative, expressed                                                        |
| Os02g0194800 | LOC_Os02g10130 | Tubulin binding cofactor C, putative, expressed                                          |
| Os02g0195000 | LOC_Os02g10160 | AGAP003371-PA, putative, expressed                                                       |
| Os02g0195300 | LOC_Os02g10180 | DNA J homolog subfamily C member, putative, expressed                                    |
| Os02g0195500 | LOC_Os02g10190 | DUF1680 domain containing protein, putative, expressed                                   |
| Os02g0195600 | LOC_Os02g10200 | Zinc finger A20 and AN1 domain-containing stress-associated protein, putative, expressed |
| Os02g0195800 | LOC_Os02g10220 | Heat shock protein DnaJ, putative, expressed                                             |
| Os02g0196000 | LOC_Os02g10230 | Metal cation transporter, putative, expressed                                            |
| Os02g0196100 | LOC_Os02g10240 | ZOS2-05 - C2H2 zinc finger protein, expressed                                            |
| Os02g0196300 | LOC_Os02g10260 | Outer membrane protein, OMP85 family protein, expressed                                  |
| Os02g0196451 | LOC_Os02g10280 | Transposon protein, putative, unclassified, expressed                                    |
| Os02g0196600 | LOC_Os02g10290 | Copper-transporting ATPase, putative, expressed                                          |
| Os02g0196700 | LOC_Os02g10300 | Polygalacturonase, putative, expressed                                                   |
| Os02g0196800 | LOC_Os02g10310 | Eumarylacetoacetase, putative, expressed                                                 |
| Os02g0196900 | LOC_Os02g10320 | 3-oxoacyl-synthase, putative, expressed                                                  |
| Os02g0197200 | LOC_Os02g10350 | MLO domain containing protein, putative, expressed                                       |
| Os02g0197300 | LOC_Os02g10360 | MONOCULM 1, putative, expressed                                                          |
| Os02g0197400 | LOC_Os02g10370 | HrpN-interacting protein from Malus, putative, expressed                                 |
| Os02g0197500 | LOC_Os02g10380 | Regulator of chromosome condensation domain containing protein, expressed                |
| Os02g0197600 | LOC_Os02g10390 | Chlorophyll A-B binding protein, putative, expressed                                     |
| Os02g0197700 | LOC_Os02g10400 | Expressed protein                                                                        |
| Os02g0197750 | LOC_Os02g10420 | Expressed protein                                                                        |
| Os02g0193350 |                | Hypothetical conserved gene                                                              |
| Os02g0193425 |                | Non-protein coding transcript                                                            |
| Os02g0193666 |                | Non-protein coding transcript                                                            |
| Os02g0193933 |                | Similar to predicted protein                                                             |
| Os02g0193967 |                | Non-protein coding transcript                                                            |
| Os02g0194350 |                | Hypothetical protein                                                                     |
| Os02g0194900 |                | BZIP transcription factor, putative, expressed                                           |
| Os02g0195150 |                | Hypothetical gene                                                                        |
| Os02g0195533 |                | Hypothetical protein                                                                     |
| Os02g0195566 |                | Non-protein coding transcript                                                            |
| Os02g0195900 |                | Conserved hypothetical protein                                                           |
| Os02g0196750 |                | Hypothetical protein                                                                     |
| Os02g0196850 |                | Hypothetical protein                                                                     |
| Os02g0197050 |                | Hypothetical gene                                                                        |
| Os02g0197125 |                | Hypothetical protein                                                                     |
|              | LOC_Os02g10140 | BZIP transcription factor, putative, expressed                                           |
|              | LOC_Os02g10150 | BZIP transcription factor, putative, expressed                                           |
|              | LOC_Os02g10170 | Expressed protein                                                                        |
|              | LOC_Os02g10210 | Expressed protein                                                                        |
|              | LOC_Os02g10250 | Expressed protein                                                                        |
|              | LOC_Os02g10270 | Retrotransposon protein, putative, unclassified, expressed                               |
|              | LOC_Os02g10330 | Retrotransposon protein, putative, unclassified, expressed                               |
|              | LOC_Os02g10340 | Retrotransposon protein, putative, unclassified, expressed                               |
|              | LOC_Os02g10410 | Expressed protein                                                                        |

**Table S10** The gene annotation within the maximum interval of *qSER-3a* identified from the databases of RAP and MSU

| RAP-ID       | MSU-ID         | Gene annotation                                                  |
|--------------|----------------|------------------------------------------------------------------|
| Os03g0352500 | LOC_Os03g22900 | SNF2 family N-terminal domain containing protein, expressed      |
| Os03g0352566 | LOC_Os03g22910 | Expressed protein                                                |
| Os03g0352600 | LOC_Os03g22930 | Expressed protein                                                |
| Os03g0352700 | LOC_Os03g22940 | Expressed protein                                                |
| Os03g0352800 | LOC_Os03g22950 | Acyl carrier protein, putative, expressed                        |
| Os03g0353000 | LOC_Os03g22960 | Expressed protein                                                |
| Os03g0353300 | LOC_Os03g22990 | OsFBX84-F-box domain containing protein, expressed               |
| Os03g0353333 | LOC_Os03g23000 | Expressed protein                                                |
| Os03g0353400 | LOC_Os03g23010 | Expressed protein                                                |
| Os03g0353500 | LOC_Os03g23020 | Expressed protein                                                |
| Os03g0353600 | LOC_Os03g23030 | Aberrant pollen transmission 1, putative, expressed              |
| Os03g0353900 | LOC_Os03g23050 | Expressed protein                                                |
| Os03g0355100 | LOC_Os03g23900 | Expressed protein                                                |
| Os03g0355200 | LOC_Os03g23935 | WD domain, G-beta repeat domain containing protein, expressed    |
| Os03g0355300 | LOC_Os03g23920 | Expressed protein                                                |
| Os03g0355500 | LOC_Os03g23940 | Expressed protein                                                |
| Os03g0355600 | LOC_Os03g23950 | Adapitin protein, putative, expressed                            |
| Os03g0355700 | LOC_Os03g23960 | IQ calmodulin-binding motif family protein, putative, expressed  |
| Os03g0355800 | LOC_Os03g23970 | Diphthine synthase, putative, expressed                          |
| Os03g0353366 |                | Hypothetical gene                                                |
| Os03g0354500 |                | Domain of unknown function DUF834 domain containing protein      |
| Os03g0355400 |                | WD40 repeat-like domain containing protein                       |
|              | LOC_Os03g22970 | Retrotransposon protein, putative, Ty3-gypsy subclass            |
|              | LOC_Os03g22980 | Retrotransposon protein, putative, Ty1-copia subclass            |
|              | LOC_Os03g23040 | Expressed protein                                                |
|              | LOC_Os03g23060 | Transposon protein, putative, unclassified, expressed            |
|              | LOC_Os03g23070 | Retrotransposon protein, putative, unclassified, expressed       |
|              | LOC_Os03g23080 | Retrotransposon protein, putative, unclassified, expressed       |
|              | LOC_Os03g23090 | Retrotransposon protein, putative, Ty3-gypsy subclass            |
|              | LOC_Os03g23100 | Retrotransposon protein, putative, Ty3-gypsy subclass            |
|              | LOC_Os03g23110 | Retrotransposon protein, putative, Ty3-gypsy subclass, expressed |
|              | LOC_Os03g23120 | Retrotransposon protein, putative, Ty3-gypsy subclass, expressed |
|              | LOC_Os03g23130 | Retrotransposon protein, putative, unclassified                  |
|              | LOC_Os03g23140 | Retrotransposon protein, putative, unclassified                  |
|              | LOC_Os03g23150 | Retrotransposon protein, putative, Ty3-gypsy subclass, expressed |
|              | LOC_Os03g23160 | Retrotransposon protein, putative, Ty3-gypsy subclass, expressed |
|              | LOC_Os03g23180 | Retrotransposon protein, putative, Ty3-gypsy subclass, expressed |
|              | LOC_Os03g23190 | Retrotransposon protein, putative, unclassified                  |
|              | LOC_Os03g23200 | Retrotransposon protein, putative, Ty3-gypsy subclass, expressed |
|              | LOC_Os03g23210 | Retrotransposon protein, putative, unclassified, expressed       |
|              | LOC_Os03g23220 | Retrotransposon protein, putative, Ty3-gypsy subclass, expressed |
|              | LOC_Os03g23230 | Retrotransposon protein, putative, unclassified                  |
|              | LOC_Os03g23250 | Retrotransposon protein, putative, unclassified, expressed       |
|              | LOC_Os03g23760 | Retrotransposon protein, putative, Ty3-gypsy subclass, expressed |
|              | LOC_Os03g23770 | Retrotransposon protein, putative, unclassified, expressed       |
|              | LOC_Os03g23790 | Retrotransposon protein, putative, Ty3-gypsy subclass, expressed |
|              | LOC_Os03g23800 | Retrotransposon protein, putative, Ty3-gypsy subclass, expressed |
|              | LOC_Os03g23820 | Retrotransposon protein, putative, unclassified                  |
|              | LOC_Os03g23830 | Retrotransposon protein, putative, Ty3-gypsy subclass, expressed |
|              | LOC_Os03g23840 | Retrotransposon protein, putative, Ty3-gypsy subclass, expressed |
|              | LOC_Os03g23850 | Retrotransposon protein, putative, Ty3-gypsy subclass            |
|              | LOC_Os03g23860 | Retrotransposon protein, putative, Ty3-gypsy subclass, expressed |
|              | LOC_Os03g23880 | Retrotransposon protein, putative, unclassified                  |
|              | LOC_Os03g23890 | Retrotransposon protein, putative, Ty3-gypsy subclass            |

**a** A88-*GS3* GCAGGGTCAAATAAATTCAATCGAAGGGATCCACGCTGCCTCCAGATGCTGCAGAGAGTAA  
HJX74-*GS3* GCAGGGTCAAATAAATTCAATCGAAGGGATCCACGCTGCCTCCAGATGCTGCAGAGAGTAA  
The second exon-*gs3* GGTGAAATAAATTCAATCGAAGGGATCCACGCTGCCTCCAGATGCTGAAGAGA  
*Pst* I (CTGCAG)

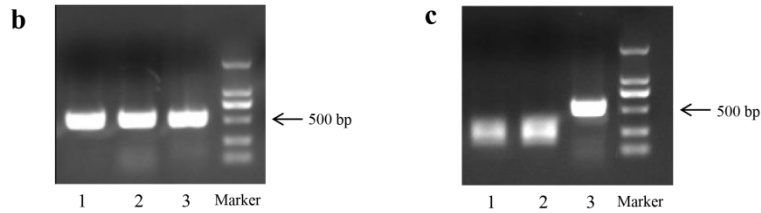

**Fig. S1** Genotyping of the *GS3* gene in A88 and HJX74. **a**, The DNA sequence variation in functional site of *GS3*. **b**, Bands amplified from different samples using the SF28-*Pst* I marker. **c**, Digested products of the amplified bands by *Pst* I. Samples: 1, A88 (*GS3*); 2, HJX74 (*GS3*); 3, Control (*gs3*).

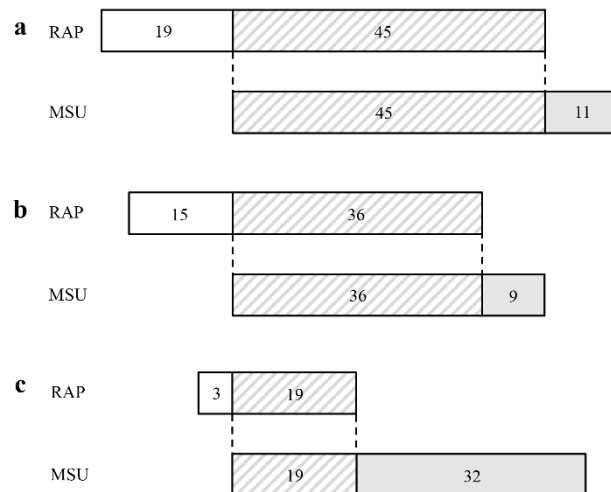

**Fig. S2** Numbers of open reading frames (ORFs) identified within the maximum intervals of *qSER-2a* (**a**), *qSER-2b* (**b**) and *qSER-3a* (**c**). Shaded box is the ORF number identified from both the RAP-DB and the MSU-RAP. White box is the ORF number identified only from the RAP-DB. Gray box is the ORF number identified only from the MSU-RAP.
